# Supplementary material
Source: publisher figshare collection journal article supplement (https://karger.figshare.com/ndownloader/files/22162797)

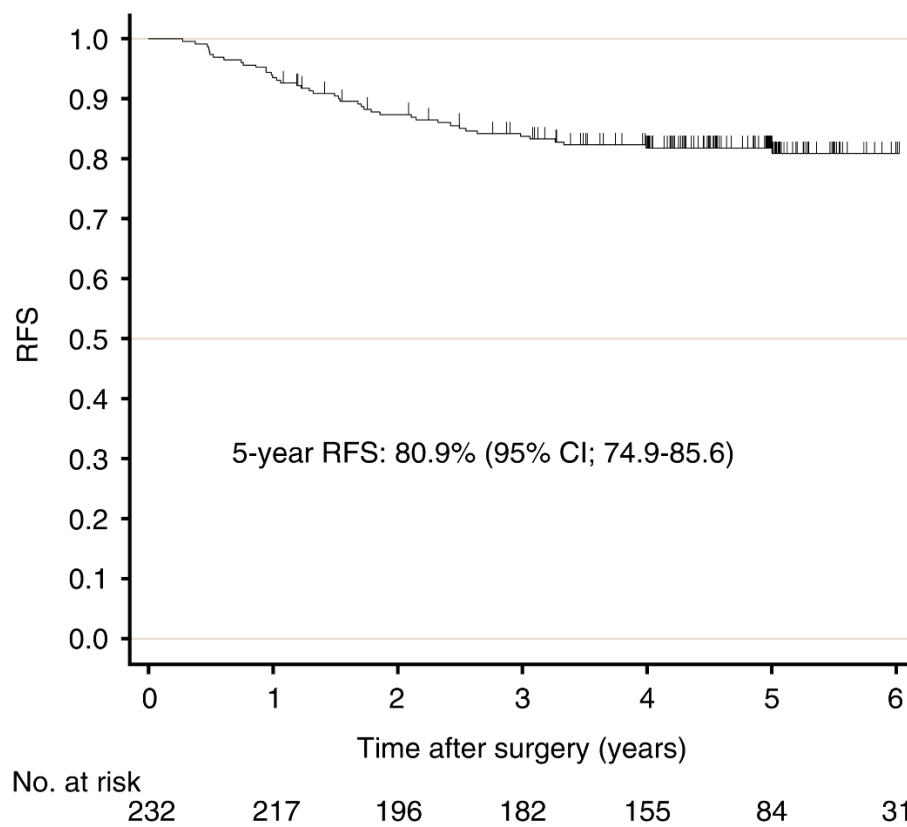

**Supplementary Figure S1.** Kaplan-Meier estimates of RFS in the overall stage II cohort.

Supplement: Supplementary file 1 [file 22162797]
